# Supplementary material for: K-seq, an affordable, reliable, and open Klenow NGS-based genotyping technology
Source: PubMed Central journal article supplement (PMC7993484; doi:10.1186/s13007-021-00733-6), 2021-03-25
Supplement: 13007_2021_733_MOESM1_ESM.pdf [file 13007_2021_733_MOESM1_ESM.pdf]

## Supplemental data 1. Scheme algorithm

1. Identify all k-mers present on the genome
2. Annotate the positions of k-mers
3. Filter out k-mers
  - 3.1. with bad dust score
  - 3.2. with GC\_content <35% or GC\_content >57%
4. Select the 1000 best k-mers (By default we sort the kmers by abundance in non repetitive regions)
5. Filter kmer that does not keep the with primer3 filtering\_criteria:
  - 5.1. MELTING\_TEMPERATURE\_THRESHOLD = 0
  - 5.2. MAX\_COMP\_END = 3
  - 5.3. MAX\_COMP\_ANY = 5
  - 5.4. MAX\_COMP\_ANY\_FACTOR = 0.44
  - 5.5. "max\_diff\_temp": 40
6. Filter out reverse complementary k-mers
7. Select groups of 10 kmers compatibles between them using primer3
8. For each group of 10 kmer predict the products generated by all combination of pairs within a group
  - 8.1. Filter by correct strandness
  - 8.2. Filter by minimum and maximum length
9. Generate the statistics for each k-mer combination
