# Supplementary material for: K-seq, an affordable, reliable, and open Klenow NGS-based genotyping technology
Source: PubMed Central journal article supplement (PMC7993484; doi:10.1186/s13007-021-00733-6), 2021-03-25
Supplement: 13007_2021_733_MOESM3_ESM.pdf [file 13007_2021_733_MOESM3_ESM.pdf]

## Supplemental data 3. Primer sequences

### Primers K-seq

#### In red k-mers sequences

#### Wheat

adaptF-9W TCG TCG GCA GCG TCA GAT GTG TAT AAG AGA CAG NNN GAC GTA TCA  
adaptR-3W GTC TCG TGG GCT CGG AGA TGT GTA TAA GAG ACA GNN NTG TTC ATC C  
adaptR-8W GTC TCG TGG GCT CGG AGA TGT GTA TAA GAG ACA GNN NTT CCT CTT C

#### Dog

adaptF-2D TCG TCG GCA GCG TCA GAT GTG TAT AAG AGA CAG NNN GAG AGG CAG  
adaptR-6D GTC TCG TGG GCT CGG AGA TGT GTA TAA GAG ACA GNN NAA GGG AAG A  
adaptR-9D GTC TCG TGG GCT CGG AGA TGT GTA TAA GAG ACA GNN NCT CCT TTC C

#### Tomato

adaptF-4T TCG TCG GCA GCG TCA GAT GTG TAT AAG AGA CAG NNN TCA TCT TC  
adaptF-5T TCG TCG GCA GCG TCA GAT GTG TAT AAG AGA CAG NNN CAA AGA AG  
adaptR-5T GTC TCG TGG GCT CGG AGA TGT GTA TAA GAG ACA GNN NTG TTG ATG

### Primers PCR

IDT-8nt-NXT\_i7\_1 CAAGCAGAAGACGGCATAACGAGATACGATCAGGTCTCGTGGGCTC\*G\*G  
IDT-8nt-NXT\_i7\_2 CAAGCAGAAGACGGCATAACGAGATTCGAGAGTGTCTCGTGGGCTC\*G\*G  
IDT-8nt-NXT\_i7\_3 CAAGCAGAAGACGGCATAACGAGATCTAGCTCAGTCTCGTGGGCTC\*G\*G  
IDT-8nt-NXT\_i7\_4 CAAGCAGAAGACGGCATAACGAGATATCGTCTCGTCTCGTGGGCTC\*G\*G  
IDT-8nt-NXT\_i7\_5 CAAGCAGAAGACGGCATAACGAGATTCGACAAGGTCTCGTGGGCTC\*G\*G  
IDT-8nt-NXT\_i7\_6 CAAGCAGAAGACGGCATAACGAGATCCTTGGAAGTCTCGTGGGCTC\*G\*G  
IDT-8nt-NXT\_i7\_7 CAAGCAGAAGACGGCATAACGAGATATCATGCGGTCTCGTGGGCTC\*G\*G  
IDT-8nt-NXT\_i7\_8 CAAGCAGAAGACGGCATAACGAGATTGTTCCGTGTCTCGTGGGCTC\*G\*G  
IDT-8nt-NXT\_i7\_9 CAAGCAGAAGACGGCATAACGAGATATTAGCCGGTCTCGTGGGCTC\*G\*G  
IDT-8nt-NXT\_i7\_10 CAAGCAGAAGACGGCATAACGAGATCGATCGATGTCTCGTGGGCTC\*G\*G  
IDT-8nt-NXT\_i7\_11 CAAGCAGAAGACGGCATAACGAGATGATCTTGCGTCTCGTGGGCTC\*G\*G  
IDT-8nt-NXT\_i7\_12 CAAGCAGAAGACGGCATAACGAGATAGGATAGCGTCTCGTGGGCTC\*G\*G  
IDT-8nt-NXT\_i5\_1 AATGATACGGCGACCACCGAGATCTACACATATGCGCTCGTCGGCAGCG\*T\*C  
IDT-8nt-NXT\_i5\_2 AATGATACGGCGACCACCGAGATCTACACTGGTACAGTCGTCGGCAGCG\*T\*C  
IDT-8nt-NXT\_i5\_3 AATGATACGGCGACCACCGAGATCTACACAACCGTTCTCGTCGGCAGCG\*T\*C  
IDT-8nt-NXT\_i5\_4 AATGATACGGCGACCACCGAGATCTACACTAACCGGTTCTCGTCGGCAGCG\*T\*C  
IDT-8nt-NXT\_i5\_5 AATGATACGGCGACCACCGAGATCTACACGAACATCGTCTCGTCGGCAGCG\*T\*C  
IDT-8nt-NXT\_i5\_6 AATGATACGGCGACCACCGAGATCTACACCCTTGTAGTCGTCGGCAGCG\*T\*C  
IDT-8nt-NXT\_i5\_7 AATGATACGGCGACCACCGAGATCTACACTCAGGCTTTCGTCGGCAGCG\*T\*C  
IDT-8nt-NXT\_i5\_8 AATGATACGGCGACCACCGAGATCTACACGTTCTCGTTCGTCGGCAGCG\*T\*C

nucleotides labelled with \* have a phosphotioate bond to prevent primer degradation by the DNA polymerase
