# Supplementary material for: K-seq, an affordable, reliable, and open Klenow NGS-based genotyping technology
Source: PubMed Central journal article supplement (PMC7993484; doi:10.1186/s13007-021-00733-6), 2021-03-25
Supplement: 13007_2021_733_MOESM4_ESM.pdf [file 13007_2021_733_MOESM4_ESM.pdf]

## Supplemental data 4. K-seq protocol

### 1- First synthesis

1  $\mu$ l of each forward short-primers (5 $\mu$ M each)  
2  $\mu$ l dNTPs (25mM)  
4,5  $\mu$ l klenow buffer 10X  
200-600 ng genomic DNA  
H<sub>2</sub>O until 45  $\mu$ l final volume

Reaction:

4 min 95°C  
5 min 37°C—add 1  $\mu$ l Klenow (5U/ $\mu$ l Klenow Fragment (3'→5' exo))  
20 min 75°C

### 2- First Exonuclease digestion

+ 2 $\mu$ l Exonuclease I (E. coli) 20U/ $\mu$ l

Reaction:

60 min 37°C  
20 min 80°C

### 3- Second synthesis

+1 $\mu$ l each reverse short-primers (5 $\mu$ M each)  
+0.5 buffer Klenow 10X  
+ H<sub>2</sub>O to 4  $\mu$ l final volume

Reaction:

4 min 95°C  
5 min 37°C. In this step add 1  $\mu$ l Klenow (5U/ $\mu$ l)  
20 min 75°C

### 4- Second Exonuclease digestion

+ 1 $\mu$ l Exonuclease I (E. coli) 20U/ $\mu$ l

Reaction:

60 min 37°C  
20 min 80°C

### 5- PCR

15  $\mu$ l reaction 4  
25 $\mu$ l Taq NEB 2X (M0270L Taq 2X Master MixNEB )  
1  $\mu$ l IDT-NXT adapter i7 (2.5 $\mu$ M)  
1  $\mu$ l IDT-NXT adapter i5 (2.5 $\mu$ M)  
8 $\mu$ l H<sub>2</sub>O

Reaction:

1 min 95°C  
X cycles (usually between 10 and 15 cycles. Adjust cycle number to avoid high molecular weight band smear in agarose gel electrophoresis)  
30s 95°C  
20s 62°C  
30s 68°C  
Last extension step. 5 min 68°C
