# Supplementary material for: K-seq, an affordable, reliable, and open Klenow NGS-based genotyping technology
Source: PubMed Central journal article supplement (PMC7993484; doi:10.1186/s13007-021-00733-6), 2021-03-25
Supplement: 13007_2021_733_MOESM6_ESM.pdf [file 13007_2021_733_MOESM6_ESM.pdf]

Sup. Table 5. Reads and Mapping statistics

| Tomato         |           |                 |                     |              |         |                 |           |                   |               |              |         |                 |           |                   |
|----------------|-----------|-----------------|---------------------|--------------|---------|-----------------|-----------|-------------------|---------------|--------------|---------|-----------------|-----------|-------------------|
| Reas_stats     |           |                 | bam stats no filter |              |         |                 |           |                   | Bam stats >57 |              |         |                 |           |                   |
| library        | raw_reads | %raw_reads_q<30 | reads_in_bam        | mapped_reads | %mapped | properly_paired | %properly | %duplicated_reads | reads_in_bam  | mapped_reads | %mapped | properly_paired | %properly | %duplicated_reads |
| BGV006347      | 3109146   | 96.9            | 3109146             | 3053905      | 98.2    | 2848552         | 91.6      | 0                 | 2124332       | 2124332      | 68.3%   | 2082355         | 67.0%     | 0                 |
| BGV006777      | 9049310   | 97.5            | 9049310             | 8946723      | 98.9    | 8545940         | 94.4      | 0                 | 6917286       | 6917286      | 76.4%   | 6807863         | 75.2%     | 0                 |
| BGV006784      | 1395390   | 96.5            | 1395390             | 1368657      | 98.1    | 1282412         | 91.9      | 0                 | 1012081       | 1012081      | 72.5%   | 989824          | 70.9%     | 0                 |
| BGV006792      | 2614570   | 97.3            | 2614570             | 2583000      | 98.8    | 2436978         | 93.2      | 0                 | 1894988       | 1894988      | 72.5%   | 1861290         | 71.2%     | 0                 |
| BGV007145      | 2136394   | 96.9            | 2136394             | 2101147      | 98.4    | 1964098         | 91.9      | 0                 | 1619356       | 1619356      | 75.8%   | 1588883         | 74.4%     | 0                 |
| BGV007155      | 1725058   | 96.8            | 1725058             | 1693701      | 98.2    | 1595958         | 92.5      | 0                 | 1313285       | 1313285      | 76.1%   | 1286524         | 74.6%     | 0                 |
| BGV007161      | 2684288   | 96.3            | 2684288             | 2639899      | 98.3    | 2488608         | 92.7      | 0                 | 1963881       | 1963881      | 73.2%   | 1926893         | 71.8%     | 0                 |
| BGV007867      | 1890570   | 96.3            | 1890570             | 1859429      | 98.4    | 1750774         | 92.6      | 0                 | 1485239       | 1485239      | 78.6%   | 1450157         | 76.7%     | 0                 |
| BGV007869      | 3762642   | 97.1            | 3762642             | 3723856      | 99      | 3527674         | 93.8      | 0                 | 2855539       | 2855539      | 75.9%   | 2796573         | 74.3%     | 0                 |
| BGV007900      | 3400540   | 96.6            | 3400540             | 3360606      | 98.8    | 3181976         | 93.6      | 0                 | 2604695       | 2604695      | 76.6%   | 2552156         | 75.1%     | 0                 |
| Heinz1706-2    | 1837322   | 96.6            | 1837322             | 1800028      | 98      | 1701162         | 92.6      | 0                 | 1379463       | 1379463      | 75.1%   | 1342483         | 73.1%     | 0                 |
| Heinz1706      | 2235912   | 97.1            | 2235912             | 2212312      | 98.9    | 2099146         | 93.9      | 0                 | 1749362       | 1749362      | 78.2%   | 1713238         | 76.6%     | 0                 |
| HEINZ+LA1589-2 | 4122630   | 97.5            | 4122630             | 4063211      | 98.6    | 3820806         | 92.7      | 0                 | 2929913       | 2929913      | 71.1%   | 2872473         | 69.7%     | 0                 |
| HEINZ+LA1589   | 2292108   | 96.9            | 2292108             | 2258330      | 98.5    | 2112176         | 92.1      | 0                 | 1658706       | 1658706      | 72.4%   | 1623330         | 70.8%     | 0                 |
| LA1589-2       | 1688210   | 96.6            | 1688210             | 1650068      | 97.7    | 1539184         | 91.2      | 0                 | 1132858       | 1132858      | 67.1%   | 1105965         | 65.5%     | 0                 |
| LA1589         | 2597392   | 96.1            | 2597392             | 2548188      | 98.1    | 2364862         | 91        | 0                 | 1782020       | 1782020      | 68.6%   | 1743175         | 67.1%     | 0                 |
| LA2263         | 3207116   | 96.5            | 3207116             | 3163072      | 98.6    | 2932696         | 91.4      | 0                 | 2344777       | 2344777      | 73.1%   | 2297594         | 71.6%     | 0                 |
| LA2312         | 3236352   | 97.2            | 3236352             | 3201903      | 98.9    | 3049030         | 94.2      | 0                 | 2525399       | 2525399      | 78.0%   | 2481945         | 76.7%     | 0                 |
| LA2843         | 5754286   | 97.3            | 5754286             | 5694567      | 99      | 5404532         | 93.9      | 0                 | 4385126       | 4385126      | 76.2%   | 4310240         | 74.9%     | 0                 |
| Wheat          |           |                 |                     |              |         |                 |           |                   |               |              |         |                 |           |                   |
| Reas_stats     |           |                 | bam stats no filter |              |         |                 |           |                   | Bam stats >57 |              |         |                 |           |                   |
| sample         | raw_reads | %raw_reads_q<30 | reads_in_bam        | mapped_reads | %mapped | properly_paired | %properly | %duplicated_reads | reads_in_bam  | mapped_reads | %mapped | properly_paired | %properly | %duplicated_reads |
| 5              | 10797584  | 97.1            | 10786324            | 10522136     | 97.6    | 8778326         | 81.4      | 0.0               | 756239        | 756239       | 7.0     | 720872          | 44018     | 0.0               |
| AGL-001        | 3895132   | 97.1            | 3891220             | 3835473      | 98.6    | 3638440         | 93.5      | 0.0               | 1165378       | 1165378      | 44103   | 1148901         | 43980     | 0.0               |
| AGL-022        | 2181276   | 97.2            | 2179264             | 2144803      | 98.4    | 2052446         | 94.2      | 0.0               | 711571        | 711571       | 32.7    | 702280          | 32.2      | 0.0               |
| AGL-601        | 1804646   | 97.1            | 1802874             | 1778729      | 98.7    | 1727924         | 95.8      | 0.0               | 699750        | 699750       | 38.8    | 692810          | 38.4      | 0.0               |
| AGL-635        | 822692    | 96.6            | 821740              | 798957       | 97.2    | 759284          | 92.4      | 0.0               | 275216        | 275216       | 33.5    | 271974          | 33.1      | 0.0               |
| JG-1           | 11750190  | 96.9            | 11740210            | 11562407     | 98.5    | 10848940        | 92.4      | 0.0               | 2003827       | 2003827      | 43847   | 1963156         | 44028     | 0.0               |
| JG-6           | 9634370   | 97.0            | 9624976             | 9485547      | 98.6    | 9011216         | 93.6      | 0.0               | 1922227       | 1922227      | 20.0    | 1889794         | 44001     | 0.0               |
| JG-9           | 11351450  | 97.3            | 11342150            | 11176413     | 98.5    | 9997664         | 88.1      | 0.0               | 1082686       | 1082686      | 43960   | 1045798         | 43870     | 0.0               |
| M5             | 1674292   | 97.4            | 1672136             | 1648781      | 98.6    | 1589920         | 95.1      | 0.0               | 624742        | 624742       | 37.4    | 617895          | 37.0      | 0.0               |
| SVEVO          | 8837918   | 97.2            | 8830708             | 8730903      | 98.9    | 8469834         | 95.9      | 0.0               | 3059690       | 3059690      | 34.6    | 3029728         | 34.3      | 0.0               |
| Dog            |           |                 |                     |              |         |                 |           |                   |               |              |         |                 |           |                   |
| Reas_stats     |           |                 | bam stats no filter |              |         |                 |           |                   | Bam stats >57 |              |         |                 |           |                   |
| 18-1607        | 2917520   | 96.7            | 2915624             | 2882978      | 98.8    | 2791176         | 95.7      | 0.0               | 2700422       | 2700422      | 92.6    | 2637468         | 90.4      | 0.0               |
| 18-231         | 6006594   | 96.2            | 6002540             | 5948047      | 99.0    | 5765142         | 96.0      | 0.0               | 5492141       | 5492141      | 91.4    | 5382732         | 89.6      | 0.0               |
| 19-353         | 4562442   | 96.5            | 4559602             | 4521292      | 99.1    | 4381804         | 96.0      | 0.0               | 4170048       | 4170048      | 91.4    | 4087295         | 89.6      | 0.0               |
| 19-730         | 2006520   | 96.2            | 2005176             | 1979984      | 98.7    | 1919324         | 95.7      | 0.0               | 1831019       | 1831019      | 91.3    | 1794421         | 89.4      | 0.0               |
| 19-821         | 14336652  | 96.2            | 14327874            | 14227315     | 99.2    | 13812776        | 96.3      | 0.0               | 13151261      | 13151261     | 91.7    | 12911401        | 90.1      | 0.0               |
| 19-827         | 50522266  | 96.2            | 50491188            | 50162687     | 99.3    | 48413780        | 95.8      | 0.0               | 46829228      | 46829228     | 92.7    | 45708809        | 90.5      | 0.0               |
| Potato         |           |                 |                     |              |         |                 |           |                   |               |              |         |                 |           |                   |
| Reas_stats     |           |                 | bam stats no filter |              |         |                 |           |                   | Bam stats >57 |              |         |                 |           |                   |
| Rudolph        | 2771878   | 97.0            | 2766440             | 2678469      | 96.6    | 2453710         | 88.5      | 0.0               | 1430893       | 1430893      | 51.6    | 1393103         | 50.3      | 0.0               |
| Eggplant       |           |                 |                     |              |         |                 |           |                   |               |              |         |                 |           |                   |
| Reas_stats     |           |                 | bam stats no filter |              |         |                 |           |                   | Bam stats >57 |              |         |                 |           |                   |
| Listada        | 2334444   | 96.9            | 2330440             | 2246368      | 96.2    | 2063334         | 88.4      | 0.0               | 282126        | 1282126      | 54.9    | 1262873         | 54.1      | 0.0               |
| Pepper         |           |                 |                     |              |         |                 |           |                   |               |              |         |                 |           |                   |
| Reas_stats     |           |                 | bam stats no filter |              |         |                 |           |                   | Bam stats >57 |              |         |                 |           |                   |

Sup. Table 5. Reads and Mapping statistics

|                 |               |      |  |         |                     |      |  |         |      |     |  |               |         |         |      |        |        |      |     |
|-----------------|---------------|------|--|---------|---------------------|------|--|---------|------|-----|--|---------------|---------|---------|------|--------|--------|------|-----|
| Dulcinea        | 1355328       | 97.4 |  | 1351854 | 1321858             | 97.5 |  | 1254046 | 92.5 | 0.0 |  |               | 1003401 | 1003401 | 74.0 |        | 989987 | 73.0 | 0.0 |
| <b>Petunia</b>  |               |      |  |         |                     |      |  |         |      |     |  |               |         |         |      |        |        |      |     |
|                 | LIBRARY STATS |      |  |         |                     |      |  |         |      |     |  |               |         |         |      |        |        |      |     |
|                 | Reas_stats    |      |  |         | bam stats no filter |      |  |         |      |     |  | Bam stats >57 |         |         |      |        |        |      |     |
| Petunia-hibrida | 1683972       | 96.9 |  | 1677882 | 1642380             | 97.9 |  | 1507054 | 89.8 | 0.0 |  | 722871        | 722871  | 43.1    |      | 702592 | 41.9   | 0    |     |
