# Supplementary material for: K-seq, an affordable, reliable, and open Klenow NGS-based genotyping technology
Source: PubMed Central journal article supplement (PMC7993484; doi:10.1186/s13007-021-00733-6), 2021-03-25
Supplement: 13007_2021_733_MOESM8_ESM.pdf [file 13007_2021_733_MOESM8_ESM.pdf]

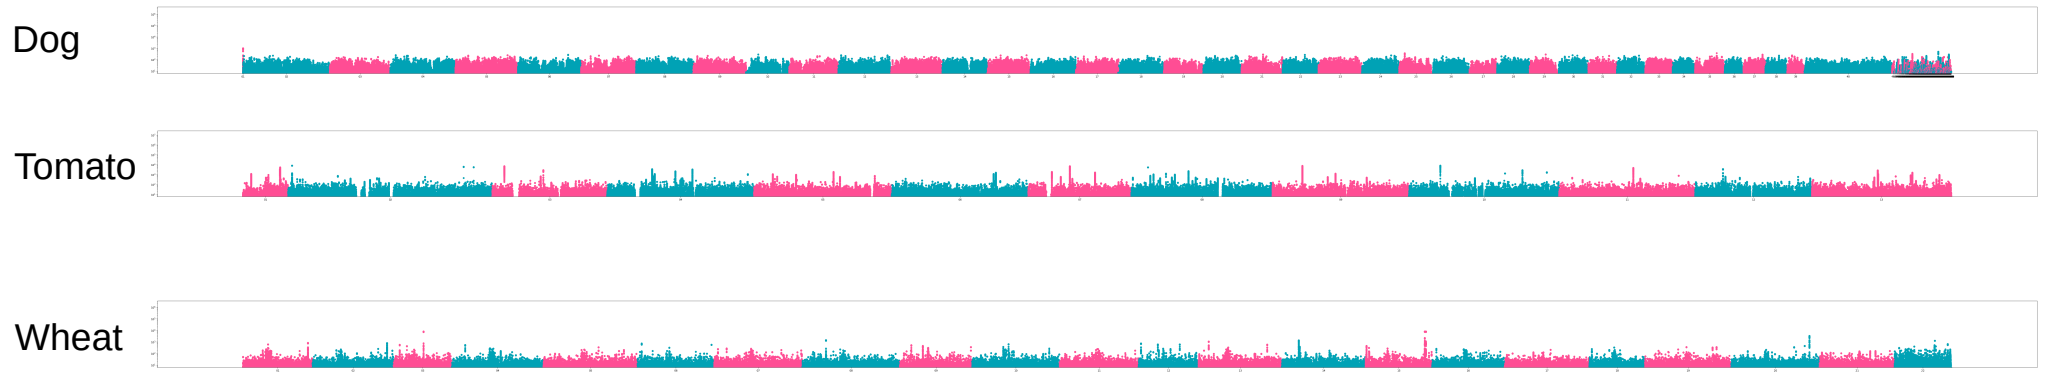

SFigure 3. Distribution of mapped fragments along genome
