# Supplementary material for: K-seq, an affordable, reliable, and open Klenow NGS-based genotyping technology
Source: PubMed Central journal article supplement (PMC7993484; doi:10.1186/s13007-021-00733-6), 2021-03-25
Supplement: 13007_2021_733_MOESM10_ESM.pdf [file 13007_2021_733_MOESM10_ESM.pdf]

Sup. table 4. Statistics predicted regions

|                           | Dog           | Tomato      | Wheat          |
|---------------------------|---------------|-------------|----------------|
| Genome size               | 2,410,976,875 | 824,674,700 | 14,547,261,565 |
| Prediction size           | 6,038,783     | 1,022,464   | 1,534,057      |
| Coverage 10X size         | 19,368,633    | 3,708,530   | 920964         |
| % genome predicted        | 0.25%         | 0.12%       | 0.01%          |
| %genome coverage 10X      | 0.80%         | 0.45%       | 0.006%         |
| % gene genome             | 50.51%        | 13.19%      | 2.33%          |
| % gene prediction         | 53.0%         | 20.98%      | 0.40%          |
| % gene coverage 10X       | 49.23%        | 28.24%      | 2.8%           |
| % repetitive genome       | 42.83%        | 64.03%      | 43.65%         |
| %repetitive prediction    | 76.4%         | 72.2%       | 23.10%         |
| % repetitive coverage 10X | 55.33%        | 62.71%      | 22.56%         |
| % prediction coverage 10X | 3.60%         | 4.06%       | 2.28%          |
