# Supplementary material for: K-seq, an affordable, reliable, and open Klenow NGS-based genotyping technology
Source: PubMed Central journal article supplement (PMC7993484; doi:10.1186/s13007-021-00733-6), 2021-03-25
Supplement: 13007_2021_733_MOESM12_ESM.pdf [file 13007_2021_733_MOESM12_ESM.pdf]

|                                                  | Wheat EN K-seq                                                                                                                                                                                                                                                                                                                                                                                                                                                                              | Wheat EN GBS   |
|--------------------------------------------------|---------------------------------------------------------------------------------------------------------------------------------------------------------------------------------------------------------------------------------------------------------------------------------------------------------------------------------------------------------------------------------------------------------------------------------------------------------------------------------------------|----------------|
| <b>Samples</b>                                   | 3                                                                                                                                                                                                                                                                                                                                                                                                                                                                                           | 4              |
| <b>Reads</b>                                     | 0.8-1.8 millions                                                                                                                                                                                                                                                                                                                                                                                                                                                                            | 1.6-2 millions |
| % sequence quality >=30 average                  | 96.87                                                                                                                                                                                                                                                                                                                                                                                                                                                                                       | 88.4           |
| % mapping properly average                       | 94.43                                                                                                                                                                                                                                                                                                                                                                                                                                                                                       | 97.8           |
| % mapping properly <math>q \ge 57</math> average | 36.16                                                                                                                                                                                                                                                                                                                                                                                                                                                                                       | 56.2           |
| n°SNPs                                           | 5047                                                                                                                                                                                                                                                                                                                                                                                                                                                                                        | 16390          |
| % call rate                                      | 78                                                                                                                                                                                                                                                                                                                                                                                                                                                                                          | 85.3           |
| Filtered SNPs (80% call rate, >10x)              | 655                                                                                                                                                                                                                                                                                                                                                                                                                                                                                         | 180            |
| Filtered SNPs % call rate                        | 77.7                                                                                                                                                                                                                                                                                                                                                                                                                                                                                        | 80             |
| <b>GBS samples:</b>                              |                                                                                                                                                                                                                                                                                                                                                                                                                                                                                             |                |
| Neopolyploid wheat samples                       | Kihagen J et al. Detecting Large Chromosomal Modifications Using Short Read Data From Genotyping-by-Sequencing. Frontiers in Plant Science. 2019;10:1133                                                                                                                                                                                                                                                                                                                                    |                |
| Dichter                                          |                                                                                                                                                                                                                                                                                                                                                                                                                                                                                             |                |
| Lacoue_NITA                                      |                                                                                                                                                                                                                                                                                                                                                                                                                                                                                             |                |
| Jams                                             |                                                                                                                                                                                                                                                                                                                                                                                                                                                                                             |                |
| Bussard                                          |                                                                                                                                                                                                                                                                                                                                                                                                                                                                                             |                |
| Diploid Wheat samples                            | Bernhardt N, Brassac J. Genomic and phylogenetic data for the identification of ancient and recurrent hybridizations in wheat taxa [Internet]. eDAL - Plant Genomics and Phenomics Research Data Repository (PGR). Gatersleben, Seeland OT Gatersleben, Cornestraße 3, 06466, Germany; 2019. Disponible en: <a href="https://doi.org/10.59102/005/55f-a628-4166-a055-6946708201c3/7576363-dc23-4265-w">https://doi.org/10.59102/005/55f-a628-4166-a055-6946708201c3/7576363-dc23-4265-w</a> |                |
| ae_tauschi_ae056                                 |                                                                                                                                                                                                                                                                                                                                                                                                                                                                                             |                |
| tr_urartu_h17521                                 |                                                                                                                                                                                                                                                                                                                                                                                                                                                                                             |                |
| tr_monococcum_h11990                             |                                                                                                                                                                                                                                                                                                                                                                                                                                                                                             |                |
| tr_urartu_h15407                                 |                                                                                                                                                                                                                                                                                                                                                                                                                                                                                             |                |
| tr_monococcum_h2009                              |                                                                                                                                                                                                                                                                                                                                                                                                                                                                                             |                |
| ae_spelloides_ae021                              |                                                                                                                                                                                                                                                                                                                                                                                                                                                                                             |                |
| ae_spelloides_ae517                              |                                                                                                                                                                                                                                                                                                                                                                                                                                                                                             |                |
| tr_urartu_h17148                                 |                                                                                                                                                                                                                                                                                                                                                                                                                                                                                             |                |
| ae_tauschi_ae025                                 |                                                                                                                                                                                                                                                                                                                                                                                                                                                                                             |                |
| tr_urartu_h17159                                 |                                                                                                                                                                                                                                                                                                                                                                                                                                                                                             |                |
| tr_monococcum_h119061                            |                                                                                                                                                                                                                                                                                                                                                                                                                                                                                             |                |
| tr_monococcum_h118612                            |                                                                                                                                                                                                                                                                                                                                                                                                                                                                                             |                |
| ae_spelloides_ae684                              |                                                                                                                                                                                                                                                                                                                                                                                                                                                                                             |                |
| ae_tauschi_ae079                                 |                                                                                                                                                                                                                                                                                                                                                                                                                                                                                             |                |
| ae_spelloides_ae1739                             |                                                                                                                                                                                                                                                                                                                                                                                                                                                                                             |                |
| ae_tauschi_ae527                                 |                                                                                                                                                                                                                                                                                                                                                                                                                                                                                             |                |
| ae_spelloides_ae1665                             |                                                                                                                                                                                                                                                                                                                                                                                                                                                                                             |                |
| ae_spelloides_ae87238                            |                                                                                                                                                                                                                                                                                                                                                                                                                                                                                             |                |
