# Supplementary material for: K-seq, an affordable, reliable, and open Klenow NGS-based genotyping technology
Source: PubMed Central journal article supplement (PMC7993484; doi:10.1186/s13007-021-00733-6), 2021-03-25
Supplement: 13007_2021_733_MOESM13_ESM.pdf [file 13007_2021_733_MOESM13_ESM.pdf]

Sup. Table 1 K-seq samples data

| Sample            | Variety/code        | Species                               | Genome              | Ploidy | Sex    | Genome sequence                            |
|-------------------|---------------------|---------------------------------------|---------------------|--------|--------|--------------------------------------------|
| AGL-601           | CHINESE SPRING      | Triticum aestivum subsp vulgare       | AABBDD              | 6N     |        | 161010_Chinese_Spring_v1.0_pseudomolecules |
| AGL-635           | THATCHER            | Triticum aestivum subsp vulgare       | AABBDD              | 6N     |        | 161010_Chinese_Spring_v1.0_pseudomolecules |
| M5                | BGE18908            | Triticum aestivum subsp speltoide     | AABBDD              | 6N     |        | 161010_Chinese_Spring_v1.0_pseudomolecules |
| AGL-001           | BGE047503           | Triticum turgidum subsp dicocco       | AABB                | 4N     |        | 161010_Chinese_Spring_v1.0_pseudomolecules |
| AGL-022           | BGE047513           | Triticum turgidum subsp turgidur      | AABB                | 4N     |        | 161010_Chinese_Spring_v1.0_pseudomolecules |
| SVEVO             | SVEVO               | Triticum turgidum subsp durum         | AABB                | 4N     |        | 161010_Chinese_Spring_v1.0_pseudomolecules |
| JG-1              | Seed give F. Vazque | Triticum urartu                       | AA                  | 2N     |        | 161010_Chinese_Spring_v1.0_pseudomolecules |
| JG-9              | Seed give F. Vazque | Triticum monococum subsp boe          | AA                  | 2N     |        | 161010_Chinese_Spring_v1.0_pseudomolecules |
|                   | 5                   | Seed give F. Vazque                   | Aegilops speltoides | BB     | 2N     | 161010_Chinese_Spring_v1.0_pseudomolecules |
| JG-6              | Seed give F. Vazque | Aegilops tauschii                     | DD                  | 2N     |        | 161010_Chinese_Spring_v1.0_pseudomolecules |
|                   |                     |                                       |                     |        |        |                                            |
| Dulcinea          | Dulcinea            | Capsicum Annum                        |                     | 2N     |        | CA_000512255.2_ASM51225v2_genomic          |
| Listada de gandia | Listada de gandia   | Solanum melogena                      |                     | 2N     |        | Eggplant_V3_Chromosomes                    |
| Rudolph           | Rudolph             | Solanum tuberosum                     |                     | 4N     |        | GCF_000226075.1_SolTub_3.0_genomic         |
| Petuniaxhibrida   |                     | Petuniaxhibrida                       |                     | 2N     |        | Petunia_axillaris_v1.6.2_genome_HiC        |
|                   |                     |                                       |                     |        |        |                                            |
| Heinz1706         | Heinz1706           | Solanum lycopersicum                  |                     | 2N     |        | S_lycopersicum_chromosomes.2.50            |
| LA1589            | LA1589              | Solanum pimpinelifolium               |                     | 2N     |        | S_lycopersicum_chromosomes.2.50            |
| BGV006777         | BGV006777           | Solanum lycopersicum var. cerasiforme |                     | 2N     |        | S_lycopersicum_chromosomes.2.50            |
| BGV006784         | BGV006784           | Solanum lycopersicum var. cerasiforme |                     | 2N     |        | S_lycopersicum_chromosomes.2.50            |
| BGV006792         | BGV006792           | Solanum lycopersicum var. cerasiforme |                     | 2N     |        | S_lycopersicum_chromosomes.2.50            |
| LA2263            | LA2263              | Solanum lycopersicum var. cerasiforme |                     | 2N     |        | S_lycopersicum_chromosomes.2.50            |
| LA2312            | LA2312              | Solanum lycopersicum var. cerasiforme |                     | 2N     |        | S_lycopersicum_chromosomes.2.50            |
| LA2843            | LA2843              | Solanum lycopersicum var. cerasiforme |                     | 2N     |        | S_lycopersicum_chromosomes.2.50            |
| BGV007867         | BGV007867           | Solanum lycopersicum var. cerasiforme |                     | 2N     |        | S_lycopersicum_chromosomes.2.50            |
| BGV007869         | BGV007869           | Solanum lycopersicum var. cerasiforme |                     | 2N     |        | S_lycopersicum_chromosomes.2.50            |
| BGV007900         | BGV007900           | Solanum lycopersicum var. cerasiforme |                     | 2N     |        | S_lycopersicum_chromosomes.2.50            |
| BGV007145         | BGV007145           | Solanum pimpinelifolium               |                     | 2N     |        | S_lycopersicum_chromosomes.2.50            |
| BGV007155         | BGV007155           | Solanum pimpinelifolium               |                     | 2N     |        | S_lycopersicum_chromosomes.2.50            |
| BGV007161         | BGV007161           | Solanum pimpinelifolium               |                     | 2N     |        | S_lycopersicum_chromosomes.2.50            |
| BGV006347         | BGV006347           | Solanum pimpinelifolium               |                     | 2N     |        | S_lycopersicum_chromosomes.2.50            |
|                   |                     |                                       |                     |        |        |                                            |
| 18/231            | Poodle              | Cannis lupus familiares               |                     | 2N     | Female | GCF_000002285.3_CanFam3.1_genomic          |
| 19/827            | Spaniel breton      | Cannis lupus familiares               |                     | 2N     | Male   | GCF_000002285.3_CanFam3.1_genomic          |
| 19/353            | Yorkshire terrier   | Cannis lupus familiares               |                     | 2N     | Female | GCF_000002285.3_CanFam3.1_genomic          |
| 19/730            | mix                 | Cannis lupus familiares               |                     | 2N     | Female | GCF_000002285.3_CanFam3.1_genomic          |
| 19/821            | mix                 | Cannis lupus familiares               |                     | 2N     | Male   | GCF_000002285.3_CanFam3.1_genomic          |
| 18/1607           | mix                 | Cannis lupus familiares               |                     | 2N     | Male   | GCF_000002285.3_CanFam3.1_genomic          |
