# Supplementary material for: K-seq, an affordable, reliable, and open Klenow NGS-based genotyping technology
Source: PubMed Central journal article supplement (PMC7993484; doi:10.1186/s13007-021-00733-6), 2021-03-25
Supplement: 13007_2021_733_MOESM14_ESM.pdf [file 13007_2021_733_MOESM14_ESM.pdf]

Sup. table 2 Dog genome sample data

| Name_ID_Study              | Name_ID_SRA             | Breed/CommonName           | BioProject  | BioSample      | SRA        | Sex |  |
|----------------------------|-------------------------|----------------------------|-------------|----------------|------------|-----|--|
| Alaskan Malamute           | AlaskanMalamute         | Alaskan Malamute           | PRJNA448733 | SAMN08872810   | SRR7107992 | F   |  |
| American Cocker Spaniel    | CockerSpanielAm         | Cocker Spaniel (Am         | SRP108905   | SRR5664964     | SRR5664964 | M   |  |
| Beagle 1                   | CFA.117995              | Beagle                     | PRJNA263947 | SAMN06159681   | SRR7107976 | M   |  |
| Bearded Collie 2           | BeardedCollie02         | Bearded Collie             | PRJEB16012  | SAMEA4505492   | SRR7107609 | M   |  |
| Belgian Malinois 4         | MA0163                  | Belgian Malinois           | PRJEB16012  | SAMEA104032048 | SRR7107526 | F   |  |
| Black and Tan Coonhound    | Coonhound01             | Black and Tan Coonhound    | PRJNA263947 | SAMN04196853   | SRR7107925 | F   |  |
| Boston Terrier             | BostonTerrier01         | Boston Terrier             | PRJNA448733 | SAMN08872906   | SRR7120145 | F   |  |
| Boxer                      | Boxer01                 | Boxer                      | PRJNA255370 | SAMN02921305   | SRR7107773 | F   |  |
| Bull Terrier 1             | BT1021                  | Bull Terrier               | PRJEB16012  | SAMEA104125116 | SRR7107556 | F   |  |
| Bull Terrier Miniature     | BT007                   | Miniature Bull Terrier     | PRJEB16012  | SAMEA4506897   | SRR7107631 | M   |  |
| Bulldog                    | Bulldog01               | Bulldog                    | PRJNA288568 | SAMN03801654   | SRR2095477 | F   |  |
| Chihuahua 1                | Chihuahua01             | Chihuahua                  | PRJNA288568 | SAMN03801656   | SRR2095478 | F   |  |
| Chinese Crested 1          | ChineseCrested01        | Chinese Crested            | PRJNA261736 | SAMN03075611   | SRR7107801 | M   |  |
| Chow Chow 2                | ChowChow02              | Chow Chow                  | PRJNA288568 | SAMN03801658   | SRR2094392 | F   |  |
| Coyote 1                   | Coyote01                | Coyote                     | PRJNA255370 | SAMN02921301   | SRR7107770 |     |  |
| Dachshund 1                | CFA.107835              | Dachshund                  | PRJNA263947 | SAMN06159670   | SRR7107965 | M   |  |
| Dalmatian 2                | Dalmatian01             | Dalmatian                  | PRJNA448733 | SAMN08872976   | SRR7120157 | F   |  |
| Doberman Pinscher          | DO242                   | Doberman Pinscher          | PRJEB16012  | SAMEA4505489   | SRR7107606 | F   |  |
| English Cocker Spaniel     | CP003                   | English Cocker Spaniel     | PRJEB16012  | SAMEA4506900   | SRR7107632 | M   |  |
| English Pointer 1          | EnglishPointer01        | Pointer (English)          | PRJNA288568 | SAMN03801665   | SRR2094398 | M   |  |
| English Springer Spaniel   | EnglishSpringerSpaniel  | English Springer Spaniel   | PRJNA263947 | SAMN03580391   | SRR7107883 | M   |  |
| German Shepherd Dog        | DS043                   | German Shepherd Dog        | PRJEB16012  | SAMEA4506895   | SRR7107629 | F   |  |
| German Wirehaired Pointer  | GermanWirehairedPointer | German Wirehaired Pointer  | PRJEB13468  | SAMEA3928144   | SRR7107585 | F   |  |
| Golden Retriever 1         | 140447_S11              | Golden Retriever           | PRJNA448733 | SAMN08873033   | SRR7120160 | M   |  |
| Great Dane 1               | DD116                   | Great Dane                 | PRJEB16012  | SAMEA104091557 | SRR7107534 | M   |  |
| Grey Wolf (Canis Lupus)    | WolfTibetan01           | Grey Wolf (Canis Lupus)    | PRJNA448733 | SAMN03652997   | SRR7107906 | M   |  |
| Grey Wolf 10               | Wolf19                  | Grey Wolf                  | PRJNA255370 | SAMN02921311   | SRR7107777 | M   |  |
| Greyhound 2                | Greyhound02             | Greyhound                  | PRJNA247491 | SAMN03067872   | SRR7107789 | M   |  |
| Groenendael                | GS104                   | Groenendael                | PRJEB16012  | SAMEA104105252 | SRR7107551 | F   |  |
| Iberian Wolf (Canis Lupus) | Wolf39                  | Iberian Wolf (Canis Lupus) | PRJNA318403 | SAMN04851099   | SRR7107942 | F   |  |
| Irish Setter               | IrishSetter01           | Irish Setter               | PRJNA448733 | SAMN08873112   | SRR7120167 | F   |  |
| Irish Water Spaniel        | IrishWaterSpaniel       | Irish Water Spaniel        | PRJNA448733 | SAMN08873115   | SRR7120168 | F   |  |
| Italian Greyhound          | ItalianGreyhound01      | Italian Greyhound          | PRJNA288568 | SAMN03801673   | SRR2094401 | M   |  |
| Jack Russell Terrier       | JackRussellTerrier      | Jack Russell Terrier       | PRJNA263947 | SAMN03580384   | SRR7107878 | M   |  |
| Jindo                      | Jindo01                 | Jindo                      | PRJDB2266   | SAMD00009664   | SRR7107521 | M   |  |
| Labrador Retriever 1       | 91317_S7                | Labrador Retriever         | PRJNA448733 | SAMN08873148   | SRR7120181 | M   |  |
| Miniature Poodle 2         | MiniaturePoodle01       | Miniature Poodle           | PRJNA448733 | SAMN08873175   | SRR7120187 | F   |  |
| MIX: Dachsund              | CFA.118000              | MIX: Dachsund              | PRJNA263947 | SAMN06159686   | SRR7107981 | M   |  |
| MIX: Golden Retriever      | GR1078                  | MIX: Golden Retriever      | PRJEB16012  | SAMEA104091572 | SRR7107549 | F   |  |
| MIX: Kerry Blue Terrier    | MIX_KerryBlueTerrier    | MIX: Kerry Blue Terrier    | PRJNA263947 | SAMN04196846   | SRR7107918 | M   |  |
| MIX: Labrador Retriever    | LA2382                  | MIX: Labrador Retriever    | PRJEB16012  | SAMEA104125075 | SRR7107552 | F   |  |
| MIX: Mixed Breed           | MI016                   | MIX: Mixed Breed           | PRJEB16012  | SAMEA4506893   | SRR7107627 | F   |  |
| MIX: Siberian Husky        | MixedBreed07            | MIX: Siberian Husky        | PRJNA448733 | SAMN08873188   | SRR7120190 | F   |  |
| Pekingese                  | Pekingese01             | Pekingese                  | PRJNA288568 | SAMN03801676   | SRR2095500 | F   |  |
| Pomeranian                 | Pomeranian01            | Pomeranian                 | PRJEB16012  | SAMEA4506892   | SRR7107626 | M   |  |
| Portuguese Podengo         | PortuguesePodengo       | Portuguese Podengo         | PRJNA263947 | SAMN03580388   | SRR7107881 | M   |  |
| Portuguese Water Dog       | PortugueseWaterDog      | Portuguese Water Dog       | PRJNA448733 | SAMN08873227   | SRR7120201 | M   |  |
| Red Wolf 1                 | Wolf25                  | Red Wolf                   | PRJNA255370 | SAMN02921317   | SRR7107783 | F   |  |
| Rottweiler 1               | 165414_S20              | Rottweiler                 | PRJNA448733 | SAMN08873243   | SRR7120204 | F   |  |
| Saint Bernard 1            | SaintBernard01          | Saint Bernard              | PRJNA288568 | SAMN03801685   | SRR2095502 | F   |  |
| Saluki 1                   | Saluki01                | Saluki                     | PRJNA288568 | SAMN03801686   | SRR2095503 | F   |  |
| Samoyed 1                  | Samoyed01               | Samoyed                    | PRJNA448733 | SAMN08873258   | SRR7120211 | F   |  |
| Scottish Terrier 1         | ScottishTerrier01       | Scottish Terrier           | PRJNA288568 | SAMN03801688   | SRR2094409 | F   |  |
| Shiba Inu 1                | CFA.107839              | Shiba Inu                  | PRJNA263947 | SAMN05770194   | SRR7107955 | F   |  |
| Siberian Husky 1           | SiberianHusky01         | Siberian Husky             | PRJNA288568 | SAMN03801690   | SRR2095539 | F   |  |
| Sloughi 1                  | Sloughi02               | Sloughi                    | PRJEB16012  | SAMEA4506885   | SRR7107619 | M   |  |

Sup. table 2 Dog genome sample data

|                     |                   |                   |             |                |            |   |  |
|---------------------|-------------------|-------------------|-------------|----------------|------------|---|--|
| Spinone Italiano    | CFA.109669        | Spinone Italiano  | PRJNA263947 | SAMN06159677   | SRR7107972 | F |  |
| Standard Poodle 1   | CFA.107842        | Standard Poodle   | PRJNA263947 | SAMN06159675   | SRR7107970 | F |  |
| Standard Schnauze   | CFA.118001        | Standard Schnauze | PRJNA263947 | SAMN06159687   | SRR7107982 | M |  |
| Tibetan Terrier 2   | TibetanTerrier02  | Tibetan Terrier   | PRJNA263947 | SAMN03580406   | SRR7107898 | M |  |
| Toy Poodle          | ToyPoodle01       | Toy Poodle        | PRJNA288568 | SAMN03801692   | SRR2095540 | F |  |
| West Highland Wh    | WW558             | West Highland Wh  | PRJEB16012  | SAMEA104091561 | SRR7107538 | F |  |
| Yorkshire Terrier 2 | PER00075          | Yorkshire Terrier | PRJNA448733 | SAMN08873470   | SRR7120258 | F |  |
| Yorkshire Terrier 3 | BAN00032          | Yorkshire Terrier | PRJNA448733 | SAMN08873449   | SRR7120237 | F |  |
| Yorkshire Terrier 3 | PER00204          | Yorkshire Terrier | PRJNA448733 | SAMN08873476   | SRR7120264 | F |  |
| Yorkshire Terrier 4 | BAN00041          | Yorkshire Terrier | PRJNA448733 | SAMN08873450   | SRR7120238 | M |  |
| Yorkshire Terrier 4 | PER00409          | Yorkshire Terrier | PRJNA448733 | SAMN08873490   | SRR7120278 | F |  |
| Standard Poodle 2   | StandardPoodle01  | Standard Poodle   | PRJNA288568 | SAMN03801691   | SRR2095325 | F |  |
| Brittany            | BrittanySpaniel01 | Brittany          | PRJNA288568 | SAMN03801653   | SRR2094390 | M |  |
