# Supplementary material for: K-seq, an affordable, reliable, and open Klenow NGS-based genotyping technology
Source: PubMed Central journal article supplement (PMC7993484; doi:10.1186/s13007-021-00733-6), 2021-03-25
Supplement: 13007_2021_733_MOESM15_ESM.pdf [file 13007_2021_733_MOESM15_ESM.pdf]

Sup. table 3GBS tomato samples data

| SRA Run     | bioproject  | biosample    | Accession Number | Species                  | Country                            |  |  |
|-------------|-------------|--------------|------------------|--------------------------|------------------------------------|--|--|
| SRR12171193 | PRJNA644494 | SAMN09229607 | BGV006347-GBS    | Solanum pimpinifolium    | Peru: Morropon: La Matanza         |  |  |
| SRR12171275 | PRJNA644494 | SAMN09229618 | BGV006777-GBS    | Solanum lycopersicon     | Ecuador: Tena: Puerto Misahualli   |  |  |
| SRR12171253 | PRJNA644494 | SAMN15045111 | BGV006784-GBS    | Solanum lycopersicon     | Ecuador                            |  |  |
| SRR12171238 | PRJNA644494 | SAMN09229620 | BGV006792-GBS    | Solanum lycopersicon     | Ecuador: Tena: Puerto Napo         |  |  |
| SRR12171242 | PRJNA644494 | SAMN15045119 | BGV007145-GBS    | Solanum pimpinellifolium | Unknown                            |  |  |
| SRR12171271 | PRJNA644494 | SAMN09229648 | BGV007161-GBS    | Solanum pimpinifolium    | Ecuador: Pedernales: Pedernales    |  |  |
| SRR12171235 | PRJNA644494 | SAMN09229662 | BGV007867-GBS    | Solanum lycopersicon     | Mexico: Uman: Uman                 |  |  |
| SRR12171232 | PRJNA644494 | SAMN15045109 | BGV007869-GBS    | Solanum lycopersicon     | Mexico                             |  |  |
| SRR12171234 | PRJNA644494 | SAMN09229672 | BGV007900-GBS    | Solanum lycopersicon     | Mexico: Huauchinango: Huauchinango |  |  |
| SRR12171265 | PRJNA644494 | SAMN15045106 | HEINZ1706-1-GBS  | Solanum lycopersicon     | USA                                |  |  |
| SRR12171264 | PRJNA644494 | SAMN15045106 | HEINZ1706-2-GBS  | Solanum lycopersicon     | USA                                |  |  |
| SRR12171212 | PRJNA644494 | SAMN15472363 | HEINZ1706+LA1    | Solanum                  | Unknown                            |  |  |
| SRR12171303 | PRJNA644494 | SAMN15472363 | HEINZ1706+LA1    | Solanum                  | Unknown                            |  |  |
| SRR12181073 | PRJNA644494 | SAMN15488734 | LA1589-1-GBS     | Solanum pimpinifolium    | Peru                               |  |  |
| SRR12181072 | PRJNA644494 | SAMN15488734 | LA1589-1-GBS     | Solanum pimpinifolium    | Peru                               |  |  |
| SRR12182112 | PRJNA644494 | SAMN15045108 | BGV007155-GBS    | Solanum pimpinifolium    | Ecuador                            |  |  |
| SRR12182111 | PRJNA644494 | SAMN15045107 | LA2312-GBS       | Solanum lycopersicon     | Peru                               |  |  |
| SRR12182110 | PRJNA644494 | SAMN15045118 | LA2843-GBS       | Solanum lycopersicon     | Peru                               |  |  |
| SRR12182109 | PRJNA644494 | SAMN15045114 | LA2263-GBS       | Solanum lycopersicon     | Peru                               |  |  |
